# Supplementary material
Source: PubMed Central journal article supplement (PMC3549119)
Supplement: 1212070110_pnas.201212070SI.pdf [file 1212070110_pnas.201212070SI.pdf]

# Supporting Information

Kasho and Katayama 10.1073/pnas.1212070110

## SI Results and Discussion

**Oligomerization of DnaA on the Minimum Region of *datA*.** To analyze whether DnaA oligomers are formed in the region between DnaA boxes 2–3, we used *datA* del5, which carries a single GATC sequence between those sites (Fig. S2), and DpnII, a restriction enzyme that specifically cleaves DNA at GATC sequences. DpnII-dependent digestion was protected in a dose-dependent manner when ATP-DnaA was included in the reaction (Fig. S4), suggesting that DnaA oligomers bind throughout this region. Protection was also observed when ADP-DnaA was used, although the level of protection was lower than that of ATP-DnaA (Fig. S4), suggesting that ADP-DnaA oligomers are not as stable as ATP-DnaA oligomers.

**Coordination Between Initiation of Replication from *oriC* and Binding of Integration Host Factor to *datA*.** To confirm the cell cycle-coordinated binding of integration host factor (IHF) to *datA*, we performed independent ChIP experiments using rifampicin to repress the second round of initiation (Fig. S5). In these experiments, synchronization of the KYA018 [*dnaC2* (Ts)] replication cycle was performed as in Fig. 4 B and C, except that rifampicin was added 5 min after the temperature shift to 30 °C to inhibit the second round of initiation (Fig. S5). *oriC* was also duplicated within 5 min after the temperature reduction to 30 °C, and the *oriC* level was further maintained for 15 min (Fig. S5A). This finding indicates that initiation occurred only once within the initial 5 min at 30 °C. *datA* was duplicated 15–20 min after initiation. IHF dissociated from *datA* before initiation and rebound to *datA* 10–20 min after initiation (Fig. S5B). This result is consistent with the data in Fig. 4C and the cell cycle-coordinated regulation of IHF binding to *datA* (Fig. S6).

Furthermore, these results explain the mechanism underlying the observation that deletion of *datA* or *ihf* causes rifampicin-resistant (Rif<sup>R</sup>) initiations at *oriC* (1, 2). As described above, IHF binds to *datA* even in the presence of rifampicin, which suggests that DDAH (*datA*-dependent DnaA-ATP hydrolysis) is activated. If *datA* or *ihf* is inactivated under such conditions, the ATP-DnaA level should increase due to the defect in DDAH, resulting in Rif<sup>R</sup> initiations. *oriC* can use HU instead of IHF for replication initiation (3). Overproduction of WT DnaA also causes extra Rif<sup>R</sup> initiation events (4).

## SI Materials and Methods

**Protein, DNA, and *Escherichia coli* Strains.** WT and mutant DnaA proteins were overexpressed and purified from *E. coli* cells, as previously described (5, 6). IHF protein was overexpressed and purified from MC1061 cells, as previously described (7, 8). The purity of each protein was >90% as judged by SDS/PAGE and Coomassie Brilliant blue staining. ATP- and ADP-DnaA were prepared by incubating DnaA and 3 μM ATP or ADP on ice for 15 min, as previously described (5).

A *datA* WT fragment (991 bp) was amplified by PCR using Kohara clone #652 (9) and primers *datA*-1 and *datA*-2 (see Table S1 for each sequence), phosphorylated with T4 kinase (Takara), and inserted into the BamHI and HindIII sites of pACYC177 to yield pKX40. The *datA* fragments used for deletion analysis in the *in vitro* DDAH system were amplified using pKX40 as a template and the following primers (Table S1): *datA*-1 and *datA*-2 for *datA* WT and *datA* ΔIBS (IHF binding site), *datA*-1 and *datA*-4 for del1, *datA*-1, and *datA*-3 for del2, *datA*-2 and *datA*-6 for del3, *datA*-4 and *datA*-6 for del4, *datA*-3 and *datA*-6 for del5 and del5ΔIBS, *datA*-6 and *datA*-10 for del6, *datA*-6 and *datA*-9 for

del7, *datA*-3 and *datA*-7 for del8, and *datA*-2 and *datA*-5 for del9 (see Table S1 for each sequence). pKX40-derivatives, including *datA* sequence deletion or substitutions, were constructed by inside-out PCR using the following primers (Table S1): delIBS-U and delIBS-L for pKX62 (ΔIBS), Ksh-43 and Ksh-44 for pKX48 (subDnaAbox1), Ksh-37 and Ksh-38 for pKX41 (subDnaAbox2), Ksh-39 and Ksh-40 for pKX42 (subIBS), Ksh-41 and Ksh-42 for pKX43 (subDnaAbox3), Ksh-45 and Ksh-46 for pKX47 (subDnaAbox4), Ksh-47 and Ksh-48 for pKX49 (subDnaAbox5), Uni-del-ins and delC for pKX51 (delC), Uni-del-ins and delD for pKX52 (delD), Uni-del-ins and insB for pKX53 (insB), and Uni-del-ins and insBplus for pKX54 (insB<sup>+</sup>). The resulting plasmids were used as templates for PCR using the primers *datA*-1 and *datA*-2, and the resulting mutant fragments were used in the *in vitro* DDAH system. The *oriC* fragment FK-9 is the same as F. kaz-9, which was previously described (10). The fragment was amplified by PCR using genomic DNA as a template and primers Kaz-17 and Kaz-18 (Table S1). Oligonucleotides for EMSA, which are listed in Table S1 along with their sequences, were annealed at room temperature overnight (DB1-U and DB1-L for DnaAbox1, subDB1-U and subDB1-L for subDnaAbox1, DB2-U and DB2-L for DnaAbox2, subDB2-U and subDB2-L for subDnaAbox2, DB3-U and DB3-L for DnaAbox3, subDB3-U and subDB3-L for subDnaAbox3, DB4-U and DB4-L for DnaAbox4, subDB4-U and subDB4-L for subDnaAbox4, DB5-U and DB5-L for DB5, subDB5-U and subDB5-L for subDnaAbox5, IBS-U and IBS-L for IBS, and subIBS-U and subIBS-L for subIBS).

All *E. coli* strains used in this study are listed in Table S3. Δ*ihfA*::*frit-kan*, Δ*ihfB*::*frit-kan*, and Δ*hupA*::*frit-kan* derived from the Keio collection were introduced into MK86 cells using P1 transduction, yielding KX30, KX31, and KX32, respectively. Δ*datA*::*kan*, derived from RSD448 cells, was introduced into MK86 cells using P1 transduction, yielding KX93. The *cat* gene was introduced near *dnaC* (i.e., between *yjiN* and *mdoB*) in PC2 using RED system (11), and the resultant strain was used as a donor of P1 transduction to MG1655, yielding KYA018. M9 medium was supplemented with 0.2% glucose, 0.2% casamino acid, and 5 μg/mL thiamine.

**DpnII Inhibition by ATP-DnaA.** The *datA* del5 DNA fragment (0.05 pmol) was incubated at 30 °C for 5 min with DpnII (New England Biolabs; 0.1 U) and various amounts of ATP- or ADP-DnaA in buffer H (15 μL) in the absence of ATP. After the reaction was terminated in 0.5% (wt/vol) SDS, DNA fragments were purified and analyzed by 6% (wt/vol) PAGE and ethidium bromide staining.

**EMSA.** For the experiments shown in Fig. 3D, various amounts of ATP- or ADP-DnaA were incubated at 15 °C for 5 min with the *datA* del5DNA fragment (0.15 pmol) in buffer H (10 μL), including 150 mM potassium glutamate, 2 mM ATP or ADP, 150 ng λDNA (as a competitor), and either 0 or 6 pmol of IHF. DNA and DNA-protein complexes were analyzed by 2% (wt/vol) agarose gel electrophoresis at 80 V for 70 min in Tris•Borate buffer, followed by staining with GelStar (Takara).

For the experiments shown in Fig. S1, ATP-DnaA or IHF were incubated with various amounts of DNA at 30 °C for 5 min in buffer H (10 μL) containing either 0 or 100 ng of poly (dI•dC). DNA and DNA-protein complexes were analyzed by 12% or 8% PAGE at 100 V for 60–80 min in Tris•Borate buffer, followed by staining with Gel-Star (Takara).

**ChIP with Synchronized Cells.** ChIP was performed according to a previously described method (12), with minor modifications. KYA018 (*dnaC2*) cells were grown in supplemented M9 medium (15 mL) at 30 °C, a permissive temperature, until they reached OD<sub>A660</sub> (absorbance at 660 nm) of 0.03. They were then shifted to 38 °C, a restrictive temperature, and further incubated for 90 min. Cells were then incubated at 30 °C for 5 min, followed by a further incubation at 38 °C for 5–55 min or at 30 °C for 5–15 min in the presence of 300 µg/mL rifampicin. Samples were withdrawn at each of the indicated time-points and cross-linked with 3% formaldehyde (37% solution; Wako) at room temperature for 5 min. The reactions were quenched by incubation in 125 mM glycine for an additional 5 min. The cells were then collected by centrifugation, washed twice with 1 mL of ice-cold TBS [50 mM Tris•HCl (pH 7.5) and 500 mM NaCl], resuspended in 125 µL of lysis buffer [50 mM Tris•HCl (pH 7.5), 100 mM NaCl, 1 mM EDTA, complete Mini EDTA-free protease inhibitor mixture (Roche), and 1 mg/mL lysozyme], incubated for 30 min at 37 °C, and lysed by the standard freeze-and-thaw method. Lysates were diluted in 500 µL (final volume) of IP buffer [50 mM Tris•HCl (pH 8.0), 250 mM NaCl, 1 mM EDTA, and 1% (vol/vol) Triton X-100] and sonicated six times for 20 s each. The resulting size of the chromosomal DNA was about 1 kb. Cell debris was then removed by centrifugation at 14 krpm (16,000 × g) for 15 min at 4 °C, and the resulting supernatant (400 µL) was removed and termed fraction I. A portion (350 µL) of fraction I was mixed with 5 µL of polyclonal rabbit anti-IHF antiserum and 60 µL of Protein A Sepharose 4 Fast Flow (GE Healthcare) (50% slurry in IP buffer), followed by incubation at 4 °C for 30 min with a gentle rotation. Sepharose beads and bound materials were washed sequentially in 500 µL

of IP buffer, 750 µL of buffer WI [50 mM Tris•HCl (pH 8.0), 500 mM NaCl, 1 mM EDTA, and 1% (vol/vol) Triton X-100], and 750 µL of buffer WII (buffer WI including 250 mM LiCl instead of 500 mM NaCl), and ultimately resuspended in 1 mL of TE [10 mM Tris•HCl (pH 8.0) and 1 mM EDTA]. After removing TE, the beads and bound materials were resuspended in 100 µL of Elution buffer [50 mM Tris•HCl (pH 8.0), 10 mM EDTA, and 1% SDS] and incubated at 65 °C for 12 h to allow de-cross-linking. DNA in the samples before (Input) and after (ChIP) immunoprecipitation were purified using a Wizard SV Gel and PCR Clean-Up System (Promega). The levels of *oriC*, *datA*, and *ylcC* were quantified by real-time quantitative PCR using SYBR Premix Ex Taq II (Perfect Real Time) (Takara) and the following primers: ORI\_1 and KWoriCRev for *oriC*, RTDATAL and RTDATAR for *datA*, and RTYLCC-L and RTYLCC-R for *ylcC* (see Table S1 for each sequence). The amounts of immunoprecipitated DNA were represented as ChIP values. As a quantitative standard, DNA in fraction I (5 µL) was similarly de-cross-linked, purified, and quantified by real-time quantitative PCR; the amount of DNA was represented as the Input value. The *ylcC* region contains no specific IHF binding site and was used as a background control (13). The ratio of ChIP value to Input value (ChIP/Input) for *ylcC* was subtracted from the ChIP/Input value for *oriC* and *datA* to calculate the value for specific IHF binding.

In addition, the amount of *ter* DNA product in fraction I was quantified by real-time quantitative PCR using the SUEterRev1 and TER\_2 primers (Table S1), and was used to calculate the *oriC/ter* and *datA/ter* ratios.

1. Von Freiesleben U, Rasmussen KV, Atlung T, Hansen FG (2000) Rifampicin-resistant initiation of chromosome replication from *oriC* in *ihf* mutants. *Mol Microbiol* 37(5): 1087–1093.
2. Morigen, Molina F, Skarstad K (2005) Deletion of the *datA* site does not affect once-per-cell-cycle timing but induces rifampin-resistant replication. *J Bacteriol* 187 (12):3913–3920.
3. Hwang DS, Kornberg A (1992) Opening of the replication origin of *Escherichia coli* by DnaA protein with protein HU or IHF. *J Biol Chem* 267(32):23083–23086.
4. Pierucci O, Helmstetter CE, Rickert M, Weinberger M, Leonard AC (1987) Overexpression of the *dnaA* gene in *Escherichia coli* B/r: Chromosome and minichromosome replication in the presence of rifampin. *J Bacteriol* 169(5):1871–1877.
5. Nishida S, et al. (2002) A nucleotide switch in the *Escherichia coli* DnaA protein initiates chromosomal replication: evidence from a mutant DnaA protein defective in regulatory ATP hydrolysis in vitro and in vivo. *J Biol Chem* 277(17):14986–14995.
6. Kawakami H, Keyamura K, Katayama T (2005) Formation of an ATP-DnaA-specific initiation complex requires DnaA Arginine 285, a conserved motif in the AAA+ protein family. *J Biol Chem* 280(29):27420–27430.
7. Filutowicz M, Grimek H, Appelt K (1994) Purification of the *Escherichia coli* integration host factor (IHF) in one chromatographic step. *Gene* 147(1):149–150.
8. Ozaki S, Katayama T (2012) Highly organized DnaA-*oriC* complexes recruit the single-stranded DNA for replication initiation. *Nucleic Acids Res* 40(4):1648–1665.
9. Kohara Y, Akiyama K, Isono K (1987) The physical map of the whole *E. coli* chromosome: Application of a new strategy for rapid analysis and sorting of a large genomic library. *Cell* 50(3):495–508.
10. Fujimitsu K, Senriuchi T, Katayama T (2009) Specific genomic sequences of *E. coli* promote replicational initiation by directly reactivating ADP-DnaA. *Genes Dev* 23(10): 1221–1233.
11. Datsenko KA, Wanner BL (2000) One-step inactivation of chromosomal genes in *Escherichia coli* K-12 using PCR products. *Proc Natl Acad Sci USA* 97(12):6640–6645.
12. Cho BK, Knight EM, Barrett CL, Palsson BO (2008) Genome-wide analysis of Fis binding in *Escherichia coli* indicates a causative role for A-AT-tracts. *Genome Res* 18(6):900–910.
13. Grainger DC, Hurd D, Goldberg MD, Busby SJ (2006) Association of nucleoid proteins with coding and non-coding segments of the *Escherichia coli* genome. *Nucleic Acids Res* 34(16):4642–4652.

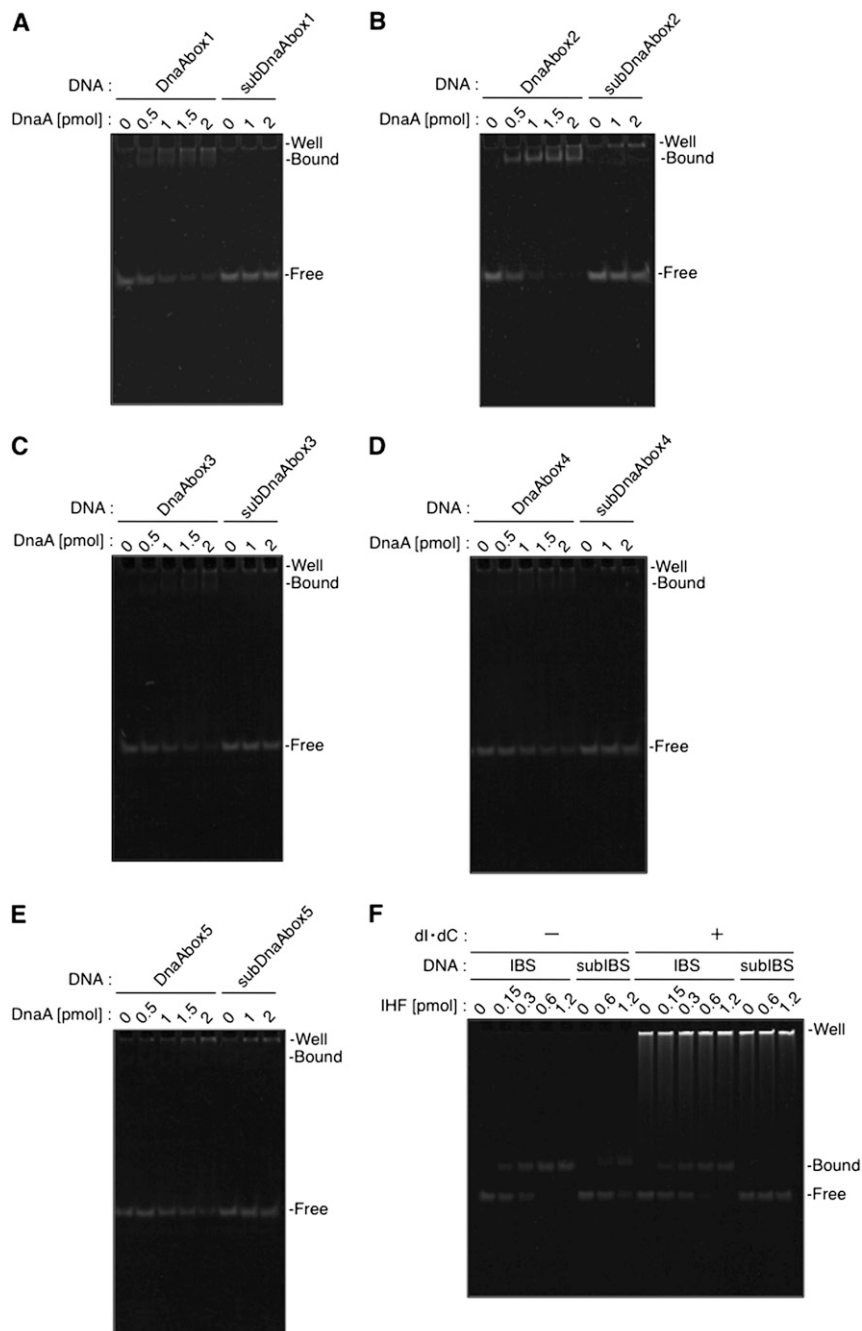

**Fig. S1.** EMSA of DnaA and IHF binding to *datA* mutant fragments. (A–E) The indicated amounts of ATP-DnaA were incubated with 0.5 pmol of each DNA at 30 °C for 5 min, followed by 12% PAGE. Well, gel well; Bound, protein-bound DNA; Free, protein-free DNA. DNA fragments used were DnaAbox1 and subDnaAbox1 (A), DnaAbox2 and subDnaAbox2 (B), DnaAbox3 and subDnaAbox3 (C), DnaAbox4 and subDnaAbox4 (D), and DnaAbox5 and subDnaAbox5 (E). (F) The indicated amounts of IHF were incubated with 0.3 pmol of IBS or subIBS DNA at 30 °C for 5 min in the presence or absence of 100 ng poly (dI·dC), followed by 8% PAGE.

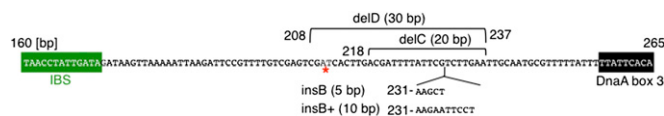

**Fig. S2.** Sequence between IBS and DnaA box 3. Positions and sequences of *delC*, *delD*, *insB*, and *insB*<sup>+</sup> mutations in addition to the GATC site (red star) are shown (1). There is only a single GATC site between DnaA boxes 2 and 3.

1. Nozaki S, Yamada Y, Ogawa T (2009) Initiator titration complex formed at *datA* with the aid of IHF regulates replication timing in *Escherichia coli*. *Genes Cells* 14(3):329–341.









**Table S2. Sequences used for substitution in *datA***

| Mutants     | Sequences of wild-type | Sequences of mutants |
|-------------|------------------------|----------------------|
| subDnaAbox1 | ATATCCACA              | <b>AATATGTGT</b>     |
| subDnaAbox2 | TTATCCACA              | <b>AACATGTGT</b>     |
| subIBS      | TAACCTATTGATA          | <b>TAACCTAAAGTAC</b> |
| subDnaAbox3 | TTATCCACA              | <b>AACATGTGT</b>     |
| subDnaAbox4 | TGTGGATGA              | <b>ACACATGTT</b>     |
| subDnaAbox5 | TGAGGATAA              | <b>ACACATGTT</b>     |

Substituted sequences are indicated in bold.

**Table S3. List of *E. coli* strains**

| Strains      | Relevant genotypes                                                                                                    | Source               |
|--------------|-----------------------------------------------------------------------------------------------------------------------|----------------------|
| DH5 $\alpha$ | <i>F- endA1 hsdR17(rk-mk+) supE44 thi1 recA1 gyrA(Nalr) relA1</i><br>$\Delta(lacZYA-argF) U169(\phi80lacZ\Delta M15)$ | Laboratory stock     |
| MG1655       | Wild-type                                                                                                             | Laboratory stock     |
| KW262-5      | MG1655 <i>rnhA::Tn3 oriC del-1071::Tn10</i>                                                                           | (1)                  |
| MK86         | KW262-5 $\Delta hda::cat$                                                                                             | (1)                  |
| KX30         | MK86 $\Delta ihfA::frt-kan$                                                                                           | Present work         |
| KX31         | MK86 $\Delta ihfB::frt-kan$                                                                                           | Present work         |
| KX32         | MK86 $\Delta hupA::frt-kan$                                                                                           | Present work         |
| KX93         | MK86 $\Delta datA::kan$                                                                                               | Present work         |
| KYA018       | MG1655 <i>dnaC2 zjj-18::cat</i>                                                                                       | Present work         |
| RSD448       | W3110 $\Delta datA::kan$                                                                                              | (2), Dr. Tohru Ogawa |
| PC2          | DG75 <i>dnaC2</i> (Ts)*                                                                                               | (3), Dr. Tohru Ogawa |

\*Other genetic markers are *leuB6 thyA47 deoC3 rpsL153*.

1. Kato J, Katayama T (2001) Hda, a novel DnaA-related protein, regulates the replication cycle in *Escherichia coli*. *EMBO J* 20(15):4253–4262.
2. Kitagawa R, Ozaki T, Moriya S, Ogawa T (1998) Negative control of replication initiation by a novel chromosomal locus exhibiting exceptional affinity for *Escherichia coli* DnaA protein. *Genes Dev* 12(19):3032–3043.
3. Carl PL (1970) *Escherichia coli* mutants with temperature-sensitive synthesis of DNA. *Mol Gen Genet* 109(2):107–122.
